# Supplementary material for: Fluoride etching opens access for bulky molecules to active sites in microporous Ti-beta zeolite
Source: Royal Society of Chemistry journal article supplement (doi:10.1039/d0qm00388c), 2020-01-01
Supplement: d0qm00388c1.pdf [file d0qm00388c1.pdf]

## Electronic Supplementary Information (ESI)

### **Fluoride etching opens the access for bulky molecules to active sites in microporous Ti-Beta zeolite**

Guoju Yang<sup>a,b</sup>, Ziyi Qiu<sup>a,c</sup>, Ji Han<sup>a</sup>, Xiaoxin Chen,<sup>\*a</sup> and Jihong Yu<sup>\* a,b</sup>

<sup>a</sup> State Key Laboratory of Inorganic Synthesis and Preparative Chemistry, College of Chemistry, Jilin University, 2699 Qianjin Street, Changchun 130012, People's Republic of China.

**E-mail: chenxiaoxin@jlu.edu.cn, jihong@jlu.edu.cn.**

<sup>b</sup> International Center of Future Science, Jilin University, 2699 Qianjin Street, Changchun 130012, People's Republic of China.

<sup>c</sup> Electron Microscopy Center, Jilin University, 2699 Qianjin Street, Changchun 130012, People's Republic of China.

## **Table of Contents**

### **1. Experimental section**

Chemicals and materials

### **2. Supplementary Figures and Tables**

### **3. References**

## 1. Experimental Section

### Chemicals and materials

The reagents used in this work include tetraethylorthosilicate (TEOS) (Beijing Chemical Works), tetraethyl orthotitanate (TEOT) (35%, Sinopharm), tetrapropylammonium hydroxide (25 wt.%, Sinopharm), hydrogen peroxide (H<sub>2</sub>O<sub>2</sub>, 30% Beijing Chemical Works), hydrofluoric acid (HF, 40 wt.%, Beijing Chemical Works), ammonium fluoride (NH<sub>4</sub>F, Beijing Chemical Works) and distilled water, tert-butyl hydroperoxide (TBHP) (65%, Sinopharm Chemical Reagent Co.). Ceric sulfate and 1-octane were purchased from Beijing Chemical Works. Pentadecane (99%), chlorobenzene (99%), 2-cyclohexen-1-one (97%), norbornene (99%), cyclooctene (95%) and methyl oleate (94%), dibenzothiophene (DBT) (98%) and 4,6-dimethyldibenzothiophene (4,6-DMDBT) (99%) were purchased from Aladdin Biochemical Technology Co..

## 2. Supplementary Figures and Tables

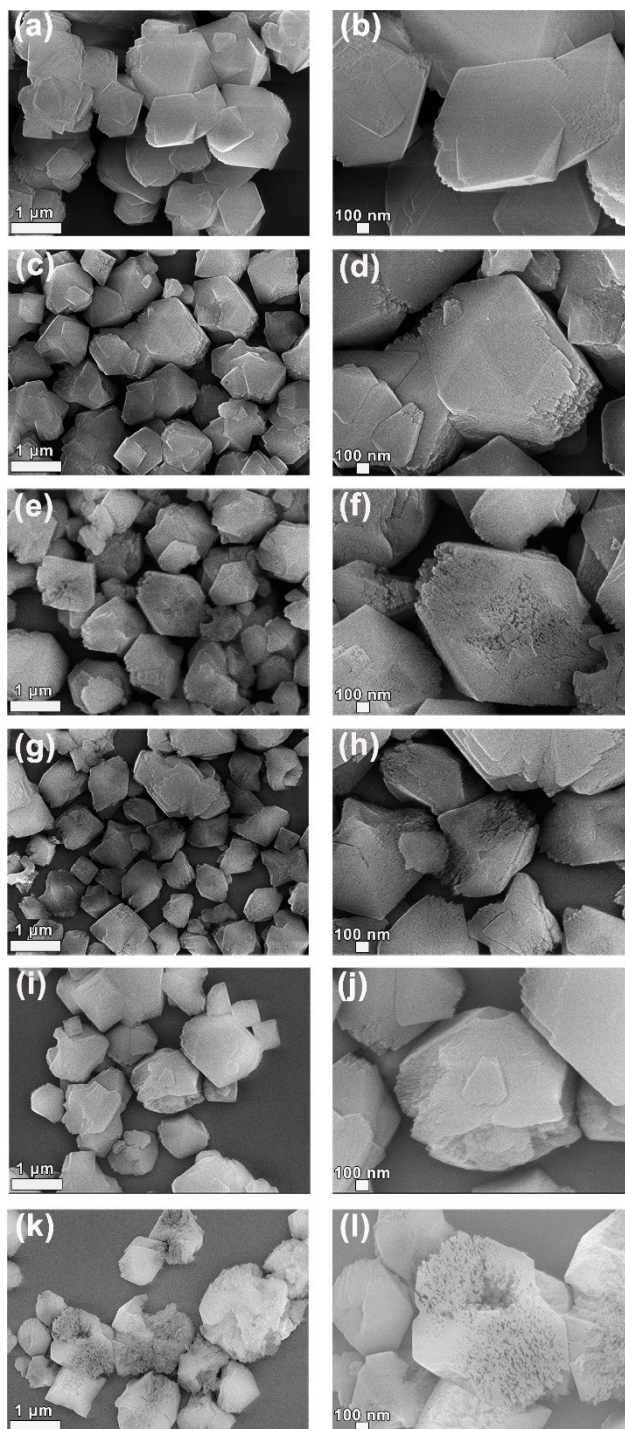

**Fig. S1** SEM images of the prepared Ti-Beta samples, (a) and (b) TB-Parent, (c) and (d) TB-HF<sub>0.1</sub>/AF<sub>0</sub>, (e) and (f) TB-HF<sub>0.1</sub>/AF<sub>0.5</sub>, (g) and (h) TB-HF<sub>0.1</sub>/AF<sub>2</sub>, (i) and (j) TB-HF<sub>0.05</sub>/AF<sub>0.5</sub>, (k) and (l) TB-HF<sub>0.25</sub>/AF<sub>0.5</sub>.

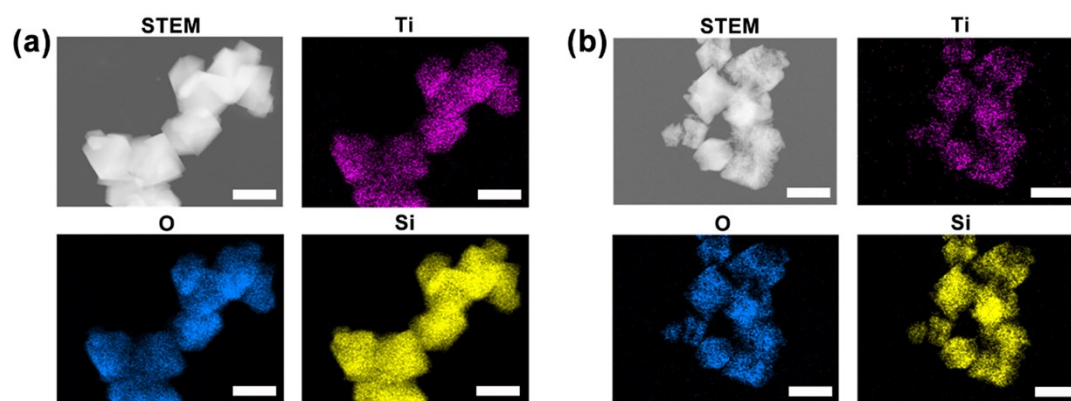

**Fig. S2** STEM-energy-dispersive X-ray spectrometry (EDX) analysis for the prepared Ti-Beta samples, (a) TB-Parent, (b) TB-HF<sub>0.25</sub>/AF<sub>0.5</sub>.

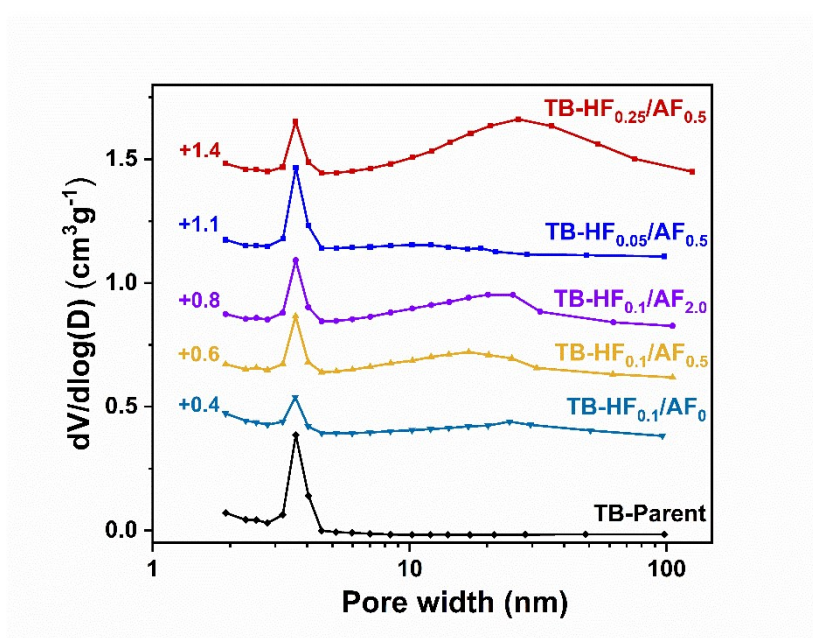

**Fig. S3** Pore size distributions of the prepared Ti-Beta samples.

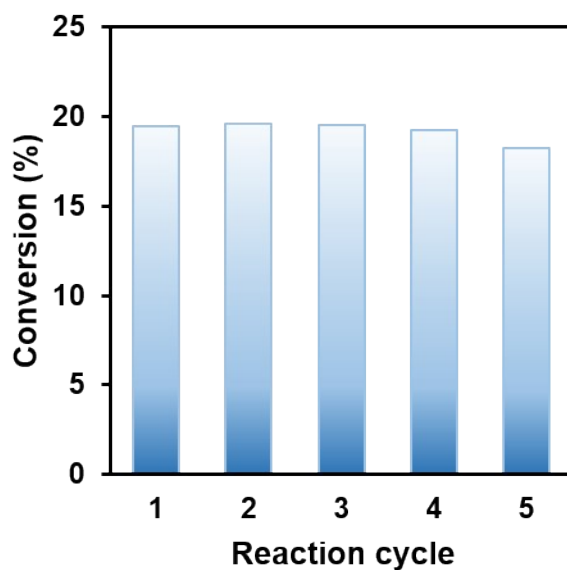

**Fig. S4** Recycle tests in the epoxidation of methyl oleate over TB-HF<sub>0.25</sub>/AF<sub>0.5</sub>. Reaction condition: 2.5 mmol of methyl oleate with 3.5 mmol H<sub>2</sub>O<sub>2</sub>, in 5mL acetonitrile, at 333 K for 2 h over 50 mg of catalysts.

**Table S1** Chemical composition of fluoride medium solution, relative yield and crystallinity of as-synthesized Ti-Beta samples

| Sample                                   | Mass <sub>TB</sub> (g) | H <sub>2</sub> O (g) | HF (M) | NH <sub>4</sub> F (wt.%) | Yield (%) <sup>a</sup> | Crystallinity(%) <sup>b</sup> |
|------------------------------------------|------------------------|----------------------|--------|--------------------------|------------------------|-------------------------------|
| TB-Parent                                | 0.6                    | 36                   | 0      | 0                        | 100                    | 100                           |
| TB-HF <sub>0.1</sub> /AF <sub>0</sub>    | 0.6                    | 36                   | 0.1    | 0                        | 86                     | 89                            |
| TB-HF <sub>0.1</sub> /AF <sub>0.5</sub>  | 0.6                    | 36                   | 0.1    | 0.5                      | 78                     | 91                            |
| TB-HF <sub>0.1</sub> /AF <sub>2</sub>    | 0.6                    | 36                   | 0.1    | 2.0                      | 72                     | 74                            |
| TB-HF <sub>0.05</sub> /AF <sub>0.5</sub> | 0.6                    | 36                   | 0.05   | 0.5                      | 88                     | 93                            |
| TB-HF <sub>0.25</sub> /AF <sub>0.5</sub> | 0.6                    | 36                   | 0.25   | 0.5                      | 73                     | 88                            |

<sup>a</sup> Yield refers to the mass ratio of individual sample to the TB-Parent sample; <sup>b</sup> Crystallinity is calculated based on the relative peak ( $2\theta = 7.5\text{--}7.6, 22.36^\circ$ ) intensity in XRD pattern.

**Table S2** Oxidative desulfurization of DBT and 4,6-DMDBT over Ti-Beta samples.<sup>a</sup>

| Sample                                   | Ti (wt.%) <sup>b</sup> | DBT oxidation                        |                  | 4,6-DMDBT oxidation                        |                  |
|------------------------------------------|------------------------|--------------------------------------|------------------|--------------------------------------------|------------------|
|                                          |                        | Con. <sub>DBT</sub> (%) <sup>c</sup> | TON <sup>d</sup> | Con. <sub>4,6-DMDBT</sub> (%) <sup>c</sup> | TON <sup>d</sup> |
| TB-Parent                                | 1.24                   | 24.8                                 | 2.1              | 9.8                                        | 0.8              |
| TB-HF <sub>0.1</sub> /AF <sub>0</sub>    | 1.00                   | 21.8                                 | 2.3              | 10.0                                       | 1.1              |
| TB-HF <sub>0.1</sub> /AF <sub>0.5</sub>  | 0.98                   | 36.7                                 | 3.9              | 29.1                                       | 3.1              |
| TB-HF <sub>0.1</sub> /AF <sub>2</sub>    | 1.00                   | 29.5                                 | 3.1              | 20.3                                       | 2.1              |
| TB-HF <sub>0.05</sub> /AF <sub>0.5</sub> | 1.19                   | 31.9                                 | 2.8              | 20.2                                       | 1.8              |
| TB-HF <sub>0.25</sub> /AF <sub>0.5</sub> | 1.00                   | 70.4                                 | 7.4              | 52.0                                       | 5.5              |

<sup>a</sup> Reaction conditions: 10 mL 500 ppm model fuels, 50 mg of catalyst, n(TBHP)/n(sulphide) is 2, for 30 min of the reaction at 60 °C. <sup>b</sup> Measured by ICP-OES. <sup>c</sup> Conversion (Conv.) = mole of converted reactant/mole of initial reactant × 100%. <sup>d</sup> Turnover number is defined as moles of the converted substrate at per mole of Ti sites for 30 min of reaction.

**Table S3** Catalytic epoxidation activities of TB-HF<sub>0.25</sub>/AF<sub>0.5</sub> and TB-Parent for bulky molecules containing C=C bonds with various molecule sizes.<sup>a</sup>

| Substrates         | TB-HF <sub>0.25</sub> /AF <sub>0.5</sub> |                           |                  | TB-Parent              |                           |                  |
|--------------------|------------------------------------------|---------------------------|------------------|------------------------|---------------------------|------------------|
|                    | Conv. <sup>b</sup><br>(%)                | Sele. <sup>c</sup><br>(%) | TON <sup>d</sup> | Conv. <sup>b</sup> (%) | Sele. <sup>c</sup><br>(%) | TON <sup>d</sup> |
| 2-cyclohexen-1-one | 50                                       | 98                        | 118              | 39                     | 97                        | 76               |
| Norbornene         | 66                                       | 92                        | 157              | 49                     | 90                        | 95               |
| Cyclooctene        | 35                                       | 99                        | 84               | 20                     | 98                        | 39               |
| Methyl oleate      | 19                                       | 99                        | 46               | 10                     | 98                        | 18               |

<sup>a</sup> Reaction conditions: 2.5 mmol of bulky substrates with 3.5 mmol H<sub>2</sub>O<sub>2</sub>, in 5 mL acetonitrile, at 60 °C for 30 min over 50 mg of catalysts. <sup>b</sup> Conversion (Conv.) = mole of converted reactant/mole of initial reactant × 100%. <sup>c</sup> Selectivity (Sele.) refers to the selectivity of the main product, i.e., (mole of epoxide)/(mole of all products) × 100%. <sup>d</sup> Turnover number (TON) is defined as moles of the converted substrate at per mole of Ti sites for 2 h of the reaction.

Table S4 Comparison of the catalytic activity of some representative titanasilicate catalysts with the prepared TB-HF<sub>0.25</sub>/AF<sub>0.5</sub> for the epoxidation reaction of bulky molecules.

| Substrate          | Catalysts | Temp.(K) | Time(h) | Substrate (mmol) | Cat.(mg) | Conversion (%) | Rate(mmol/g/h) <sup>a</sup> | Reference |
|--------------------|-----------|----------|---------|------------------|----------|----------------|-----------------------------|-----------|
| norbornene         | Ti-Beta   | 333      | 2       | 2.5              | 50       | 66.0           | 16.5                        | This work |
|                    | Ti-Beta   | 333      | 4       | 5.3              | 50       | 54.3           | 14.4 <sup>b</sup>           | 1         |
| cyclooctene        | Ti-Beta   | 333      | 2       | 2.5              | 50       | 35.0           | 5.0                         | This work |
|                    | Ti-Beta   | 333      | 4       | 4.0              | 60       | 14.0           | 2.3 <sup>b</sup>            | 1         |
| 2-cyclohexen-1-one | Ti-Beta   | 333      | 2       | 2.5              | 50       | 50.0           | 12.5                        | This work |
|                    | Ti-Beta   | 343      | 5       | 5.0              | 100      | 51.6           | 5.2 <sup>b</sup>            | 2         |
| Methyl Oleate      | Ti-Beta   | 333      | 2       | 2.5              | 50       | 18.0           | 4.5                         | This work |
|                    | TS-1      | 323      | 5       | 0.3              | 150      | 92.0           | 0.4 <sup>b</sup>            | 3         |
|                    | TS-1      | 363      | 9       | 0.06             | 10       | 75.8           | 0.5 <sup>b</sup>            | 4         |
|                    | TS-1      | 353      | 24      | 0.3              | 150      | 93.0           | 0.1 <sup>b</sup>            | 5         |
|                    | Ti-MCM-41 | 323      | 8       | 1                | 30       | 26.7           | 1.1 <sup>b</sup>            | 6         |
|                    | Ti-Beta   | 323      | 8       | 1.0              | 30       | 45.3           | 1.9 <sup>b</sup>            | 6         |

<sup>a</sup>Rate refers to millimole of the converted substrate at per gram of catalyst for certain hours of the reaction. <sup>b</sup>Rate value is calculated based on the reported data in the literature.



### 3. References

1. J. Přeč and J. Čejka, UTL titanosilicate: An extra-large pore epoxidation catalyst with tunable textural properties, *Catal. Today*, 2016, **277**, 2-8.
2. B. Tang, W. L. Dai, X. M. Sun, N. J. Guan, L. D. Li and M. Hunger, A procedure for the preparation of Ti-Beta zeolites for catalytic epoxidation with hydrogen peroxide, *Green Chem.*, 2014, **16**, 2281-2291.
3. N. Wilde, J. Přeč, M. Pelz, M. Kubů, J. Čejka and R. Gläser, Accessibility enhancement of TS-1-based catalysts for improving the epoxidation of plant oil-derived substrates, *Catal Sci Technol*, 2016, **6**, 7280-7288.
4. Y. Wei, G. Li, Q. Lü, C. Cheng and H. Guo, Green and efficient epoxidation of methyl oleate over hierarchical TS-1, *Chinese J Catal*, 2018, **39**, 964-972.
5. N. Wilde, C. Worch, W. Suprun and R. Gläser, Epoxidation of biodiesel with hydrogen peroxide over Ti-containing silicate catalysts, *Microporous Mesoporous Mater.*, 2012, **164**, 182-189.
6. M. Cambor, A. Corma, P. Esteve, A. Martínez and S. Valencia, Epoxidation of unsaturated fatty esters over large-pore Ti-containing molecular sieves as catalysts: important role of the hydrophobic–hydrophilic properties of the molecular sieve, *Chem. Commun.*, 1997, 795-796.
